# Supplementary material
Source: PubMed Central journal article supplement (PMC3118411)
Supplement: NIHMS272430-supplement-Supplementary_Data.pdf [file NIHMS272430-supplement-Supplementary_Data.pdf]

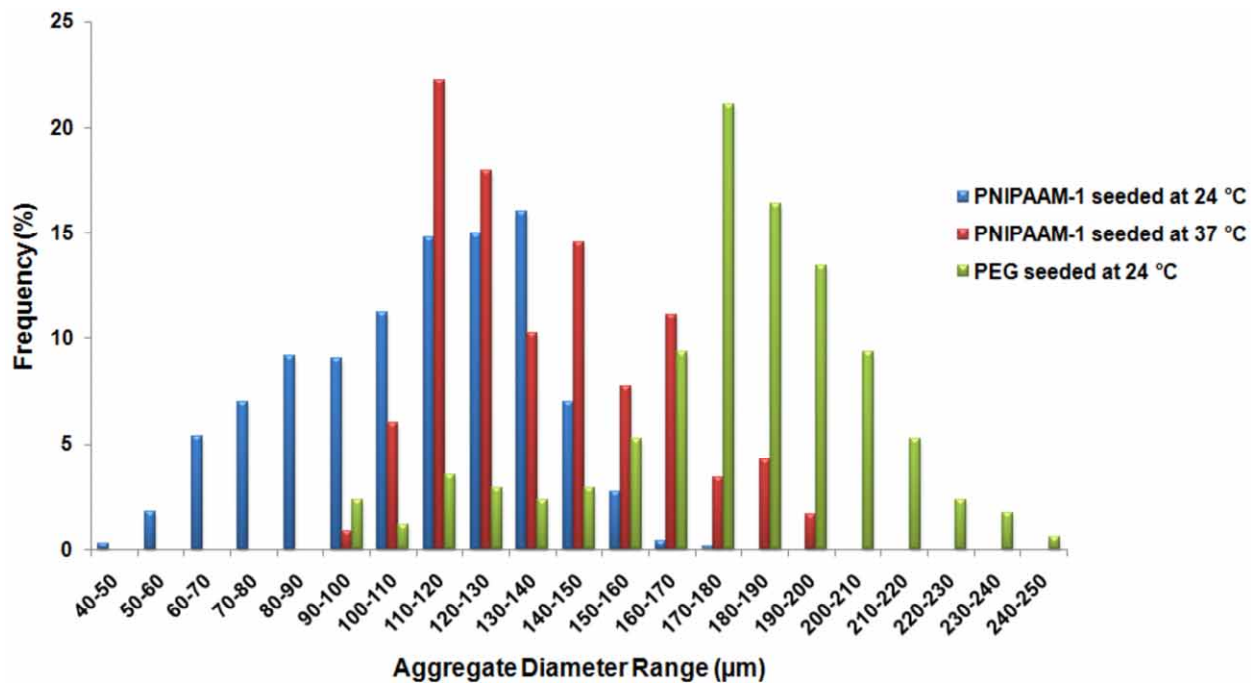

**Supplementary Fig. 1** The frequency of diameter ranges for aggregates retrieved from PNIPAAm-1 microwells seeded at 24 °C, PNIPAAm-1 microwells seeded at 37 °C and PEG microwells seeded at 24 °C. It should be noted that this is not necessarily a good comparison because aggregate release from PNIPAAm-1 microwells seeded at 37 °C was less than 10% for any retrieval time or temperature and a maximum aggregate release of 15.4±3.8% from PEG microwells was shown for any time point or temperature, whereas PNIPAAm-1 microwells seeded at 24 °C exhibited a maximum aggregate release of 74.8±10.4%. The shifted distributions of aggregate diameter ranges for 3 different experimental conditions may have resulted from the fact that PNIPAAm-1 microwells had a maximum microwell area of ~6000 µm<sup>2</sup> at 24 °C and a maximum area of ~18000 µm<sup>2</sup> at 37 °C whereas PEG microwells held a maximum exposed area of ~28000 µm<sup>2</sup> at 24 °C.
